# Supplementary material for: MOF-Derived Cu3P nanoparticles coated with N-doped carbon for nitrogen fixation
Source: Royal Society of Chemistry journal article supplement (doi:10.1039/d1cc06762a), 2022-01-01
Supplement: d1cc06762a1.pdf [file d1cc06762a1.pdf]

# The MOF-derived Cu<sub>3</sub>P nanoparticles Coated in N-doped carbon nanosheets for Efficient Nitrogen Reduction Reaction

Jian Li, Xiaoying Lu, Junfeng Huang, Kailu Guo, Cailing Xu\*

## 1. Experiment section

### 1.1 Chemicals

Copper(II) sulfate pentahydrate CuSO<sub>4</sub>·5H<sub>2</sub>O (KESHI, ≥99.0%), 4,5-imidazoledicarboxylic acid (aladdin, ≥97%), sodium hydroxide NaOH (Rionlon, ≥96%), Sodium sulfate anhydrous Na<sub>2</sub>SO<sub>4</sub> (aladdin, ≥99%), Salicylic acid C<sub>7</sub>H<sub>6</sub>O<sub>3</sub> (Fengchuan, ≥99.5%), Sodium nitroprusside dihydrate Na<sub>2</sub>[Fe(CN)<sub>5</sub>NO]·2H<sub>2</sub>O (Energy Chemical, ≥99%), sodium salicylate C<sub>7</sub>H<sub>5</sub>O<sub>3</sub>Na (Kermel, ≥99.0%), Sodium hypochlorite solution (DAMAO, available chlorine ≥8%), ammonium chloride NH<sub>4</sub>Cl (XL, ≥99.5%), Hydrazine hydrate N<sub>2</sub>H<sub>4</sub>·H<sub>2</sub>O (DAMAO, ≥80%), 4-Dimethylaminobenzaldehyde C<sub>9</sub>H<sub>11</sub>NO (Alfa Aesar, ≥98%), Ethanol C<sub>2</sub>H<sub>6</sub>O (Rionlon, ≥99.7%), NaH<sub>2</sub>PO<sub>2</sub>·H<sub>2</sub>O (Kermel, ≥98%). The deionized water (DI-water) was used throughout the synthesis.

### 1.2 Synthesis of materials

#### 1.2.1 Preparation of Cu-MOFs

4,5-Imidazoledicarboxylic acid (1.2 mmol) was dispersed in 72 mL 0.02 M NaOH solution in a 150 mL breaker. CuSO<sub>4</sub>·5H<sub>2</sub>O (1.2 mmol) was dissolved in 24 mL DI-water and injected in the above solution. The mixed solution was stirred at room temperature for 3 h. The blue sediment was centrifuged, washed with DI-water and

ethanol for several times and dried at 60 °C for 12 h.

### **1.2.2 Preparation of Cu<sub>3</sub>P@NC**

50 mg of the above Cu-MOFs was placed in the porcelain boat at the downstream of the tubular furnace and 2.0 g of NaH<sub>2</sub>PO<sub>2</sub>·H<sub>2</sub>O was placed in another porcelain at the upstream of the tubular furnace. Then, the tubular furnace was heated to 300 °C with 5 °C/min and kept for 2 h under the Ar flow.

### **1.2.3 Preparation of pure Cu<sub>3</sub>P**

100 mL 0.05 M CuSO<sub>4</sub> solution and 40 mL 0.25 M NaOH solution were mixed in a 150 mL breaker. Then, the above solution was stirred at room temperature for 2 h. After that, the blue sediment was centrifuged, washed with DI-water several times. Finally, the product and NaH<sub>2</sub>PO<sub>2</sub>·H<sub>2</sub>O (mass ratio 1:5) were put into two different porcelain boat and annealed at 300 °C for 2 h with 5 °C/min under the Ar flow.

### **1.2.4 Preparation of pure Cu<sub>3</sub>P@C**

Synthesis of Cu<sub>2</sub>O cubes: Typically, CuSO<sub>4</sub> (0.11 g) and PVP (0.2 g) were added to DI-water (17 mL) in a round-bottomed flask accompanied with magnetic stirring to achieve complete dissolution, denoted as solution A. Trisodium citrate dihydrate (0.22 g) and Na<sub>2</sub>CO<sub>3</sub> (0.13 g) were dissolved in DI-water (2 mL), denoted as solution B. Then, the solution B was dropwise added into solution A at room temperature until the dark blue solution generated. After 20 min, glucose solution (2 mL, 0.6 M) was dropwise added into mixture at 80 °C. When the color of the suspension transformed darkblue into brick red, the mixture remained aged for 2 h. After cooling to room temperature naturally, the resulting precipitate was separated and collected by centrifugation for 5

min, followed by washing with DI-water and ethanol several times, respectively, and eventually dried in a vacuum at 60 °C for 12 h.

Synthesis of 3D Cu-BDC nanoarray (Cu-BDCNA): Cu<sub>2</sub>O (10 mg) was dispersed in DMF (10 mL) with magnetic stirring to form solution C. H<sub>2</sub>BDC (0.167 g) was completely dissolved in DMF (10 mL) to form solution D. Then, solution D was added into solution C under magnetic stirring at 120 °C. After continuous stirring for 10 min, the obtained mixed solution was aged at 120 °C for 1 h. The resulting precipitate was collected by centrifugation for 5 min, washed with DI-water and ethanol several times, respectively, and dried at 60 °C for overnight.

The Cu<sub>3</sub>P@C catalysts were synthesized through phosphorization procedure using the as-prepared Cu-BDCNA as precursors. Typically, the as-prepared Cu-BDCNA and NaH<sub>2</sub>PO<sub>2</sub> (*m/m* = 1/5) were placed at two separate positions in a quartz tube with NaH<sub>2</sub>PO<sub>2</sub> at the upstream side. The quartz tube was thermally treated at a temperature of 350 °C with a ramp rate of 3 °C min<sup>-1</sup> and then maintained at this temperature for 5 h under a flowing Ar. After naturally cooling to room temperature, the obtained phosphatized catalyst was collected and washed with DI-water and ethanol for several times, respectively, and dried in an oven at 60 °C for 12 h.

### **1.3 The preparation of working electrode**

Typically, 3 mg catalyst and 3 mg carbon black were dispersed in a mixed solution containing 40 μL Nafion solution and 730 μL ethyl alcohol and 730 μL DI-water. Next, the mixed solution was sonicated for 1 h to form a homogeneous ink. Then, 100 μL of the above ink was dropped on the carbon cloth with area 1 × 1 cm<sup>2</sup>.

## 1.4 Characterizations

The powder X-ray diffraction (XRD) pattern were measured on a Rigaku D/max 2400 X-ray generator diffractometer. Scanning electron microscopy (SEM) was performed on a Thermo Scientific Apreo S machine. Transmission electron microscope (TEM) images and energy dispersive X-ray spectroscopy (EDS) mapping were obtained from a transmission electron microscope (Philips Tecnai™ G2 F30). High-angle annular dark-field scanning transmission electron microscopy (HAADF-STEM) images were acquired on an aberration-corrected TEM (Titan Themis Cubed G2 300) operated at 300 kV. The UV-vis absorption spectra were observed on a Cary-5000 spectrophotometer. Fourier transform infrared spectroscopy spectra (FTIR) were collected by a Bruker VERTEX 70v FT-IR spectrometer. X-ray photoelectron spectroscopy (XPS) measurements were performed on a PHI-5702 instrument operated with a Mg-K $\alpha$  excitation source (1253.6 eV). Binding energies (BE) were determined using the C 1s peak at 284.8 eV as a charge reference. Thermogravimetric (TG) analysis was conducted on Netzsch STA 449C, with a heating rate of 5 °C min<sup>-1</sup> from 25 to 750 °C under highly pure N<sub>2</sub> atmosphere. The absorbance data of the ultraviolet-visible (UV-vis) spectrophotometer was measured on an Agilent Cary 5000. Raman spectra measurements were carried out on a Raman spectrometer (Jobin Yvon Co., France) model HR800 and 532 nm laser as the excitation wavelength.

## 1.5 Electrochemical measurement

The electrochemical experiment was carried out with an Autolab electrochemical workstation (PGSTAT302N, Metrohm) in a two-compartment electrolytic cell

containing 50 mL 0.1 M Na<sub>2</sub>SO<sub>4</sub> solution. The standardized three-electrode configuration includes Cu<sub>3</sub>P@NC/CP as working electrode, carbon rod as counter electrode and Ag/AgCl as reference electrode, respectively. The potentials with respect to reversible hydrogen electrode is calculated by the following equation, E(vs. RHE) = E(vs. Ag/AgCl) + 0.059 × pH + 0.197 V. Before NRR measurement, 0.1 M Na<sub>2</sub>SO<sub>4</sub> solution electrolyte was purged with pure N<sub>2</sub> for 30 min. All experiments were operated at room temperature.

### 1.6 Determination of NH<sub>3</sub>

The ammonia produced by electrochemical NRR was detected via UV-vis spectrophotometer using indophenol blue method<sup>1</sup>. Typically, 2 mL of electrolyte was taken out from the cathodic cell after 2 h NRR process. Then, 2 mL of NaOH solution composed of 5 wt% sodium citrate and 5 wt% salicylic acid, 1 mL of 0.05 M NaClO solution and 0.2 mL wt% sodium nitroprusside dihydrate was added into the above electrolyte in turn. After the mixed solution was kept in the dark for 2 h, the UV-vis spectrophotometer was used to measure the wavelength at 655 nm. The concentration-absorbance curve was calibrated using standard NH<sub>4</sub>Cl solution with a series of concentrations. The fitting curve ( $y = 0.571x + 0.0465$ ,  $R^2 = 0.999$ ) shows good linear relation of absorbance value with NH<sub>3</sub> concentration. The produced NH<sub>3</sub> yield rate was calculated by the following equation:

$$NH_3 \text{ Yield Rate} = \frac{[NH_3] \times V}{m_{cat.} \times t}$$

Where [NH<sub>3</sub>] is the produced NH<sub>3</sub> concentration (μg mL<sup>-1</sup>), V is the volume of electrolyte (mL), t is the NRR time (min) and m<sub>cat.</sub> is the loaded mass of catalyst (mg).

### 1.7 Calculation of Faradaic efficiency (FE):

FE was calculated according to the following equation:

$$FE = \frac{3 \times F \times [NH_3] \times V}{Q \times 17}$$

Where  $[NH_3]$  is the produced  $NH_3$  concentration ( $\mu g mL^{-1}$ ),  $V$  is the volume of electrolyte (mL),  $F$  is the Faradaic constant,  $Q$  is the quantity of charge in Coulombs (C).

### 1.8 Determination of $N_2H_4$

The possible by-product  $N_2H_4$  was determined via Watt and Chrisp method<sup>2</sup>. The color agent was prepared with 5.99 g of p-Dimethylaminobenzaldehyde, 30 mL of concentrated hydrochloric acid and 300 mL of ethanol. In detail, 5 mL of electrolyte was removed from the cathodic cell after 2 h NRR. Then, 5 mL of color agent was added to the above electrolyte. After standing in the dark for 20 minutes, the solution was measured on a UV-vis spectrophotometer. The maximum UV-vis absorption was measured at 455 nm. The concentration-absorbance curves were calibrated using standard  $N_2H_4 \cdot H_2O$  solution in a series of concentration. The fitting curve ( $y = 0.613x + 0.014$ ,  $R^2 = 0.999$ ) shows a good linear relation between absorbance with  $N_2H_4$  concentration.

## 2. Figures

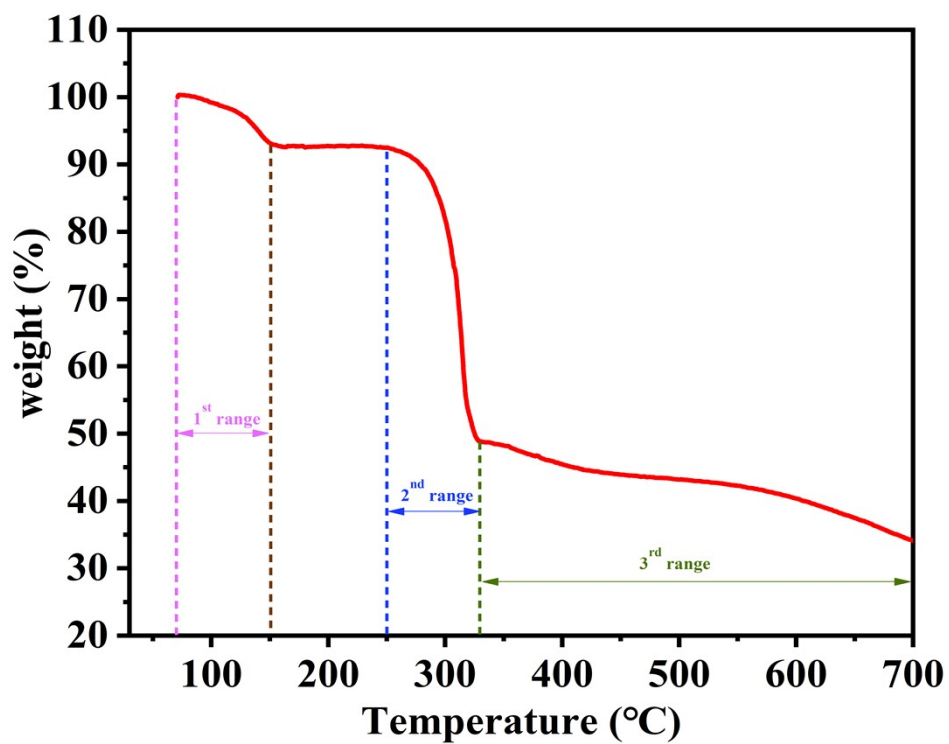

Fig. S1. The TG curve of synthesized Cu-MOFs.

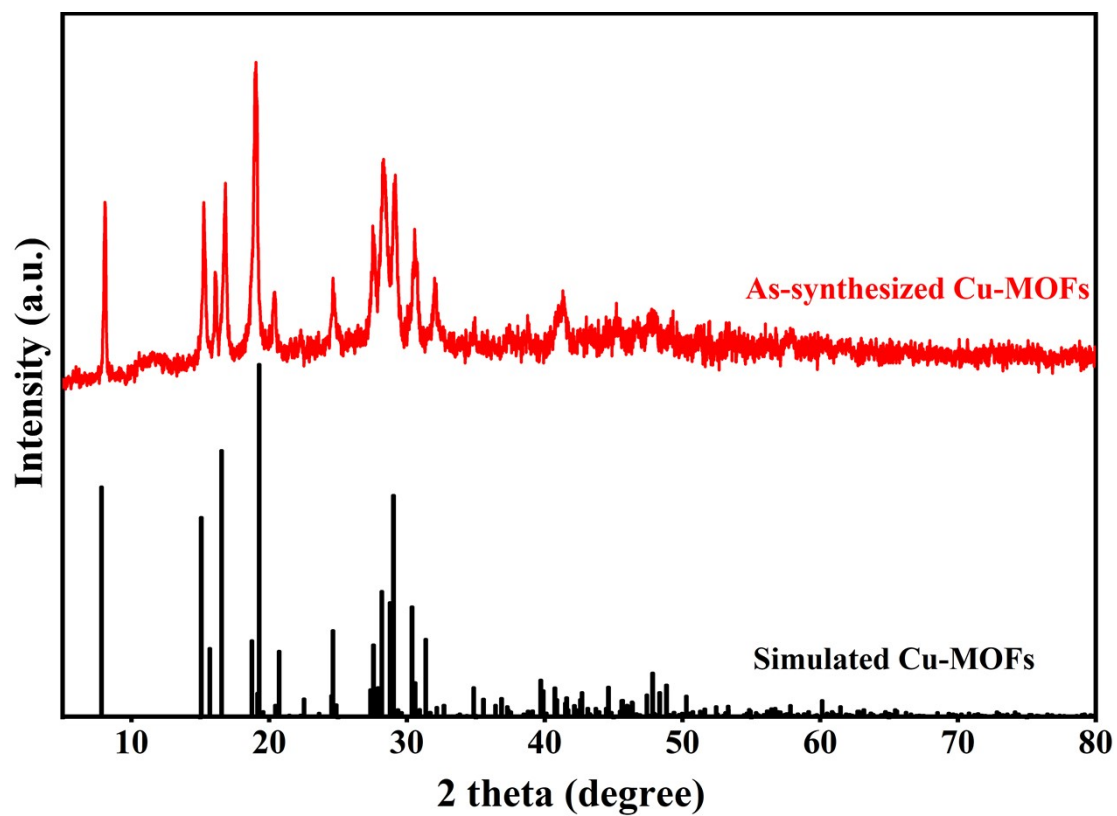

Fig. S2. The XRD patterns of synthesized Cu-MOFs.

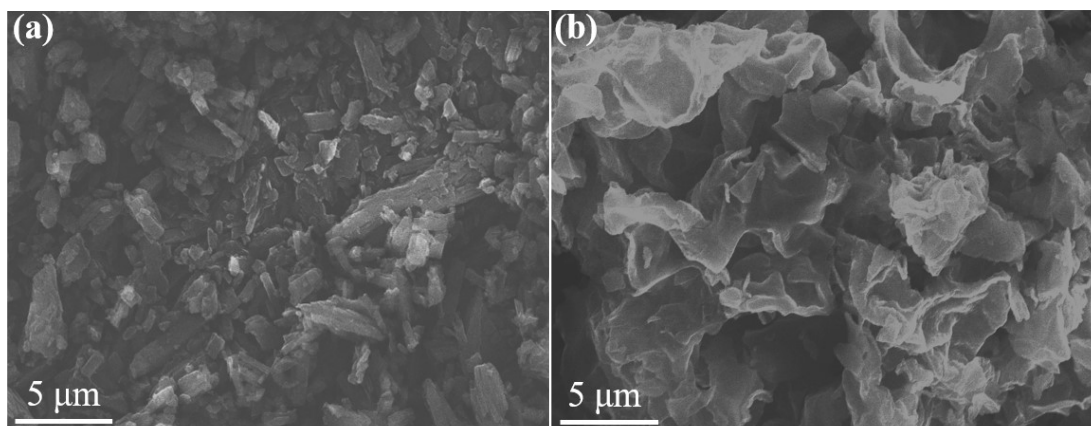

**Fig. S3.** The SEM image of synthesized (a) Cu-MOFs and (b) Cu<sub>3</sub>P@NC .

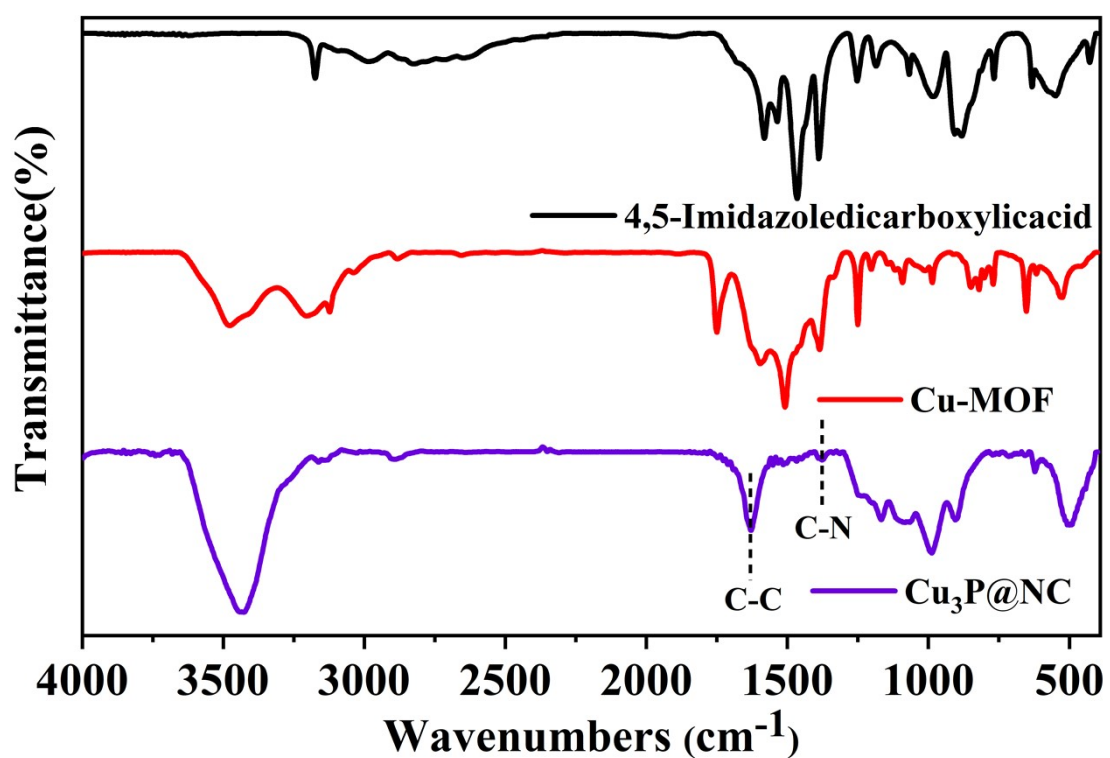

**Fig. S4.** The FT-IR spectra of 4,5-imidazoledicarboxylic acid, Cu-MOFs and Cu<sub>3</sub>P@NC.



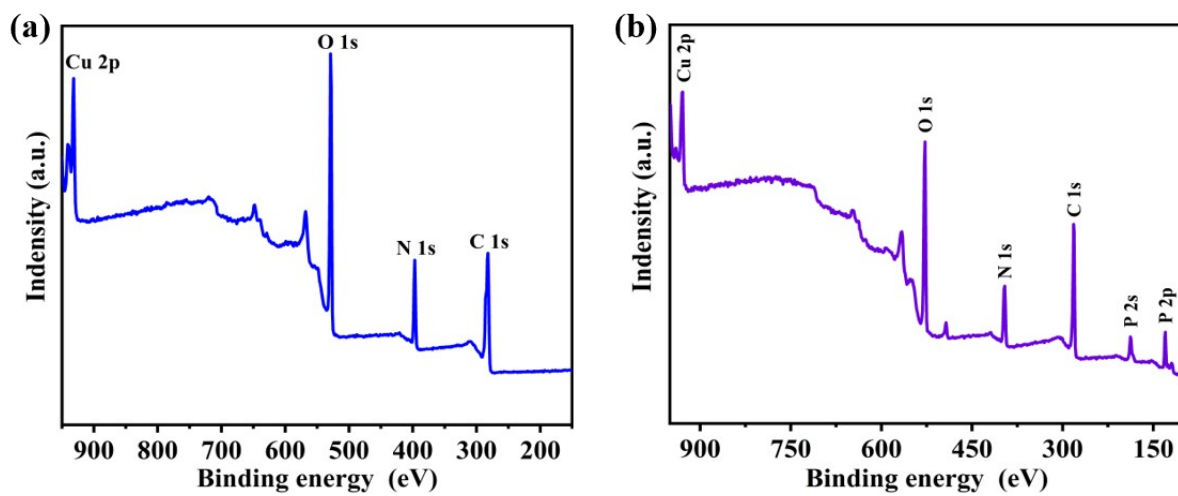

Fig. S5. XPS spectra of (a) Cu-MOFs and (b) Cu<sub>3</sub>P@NC.

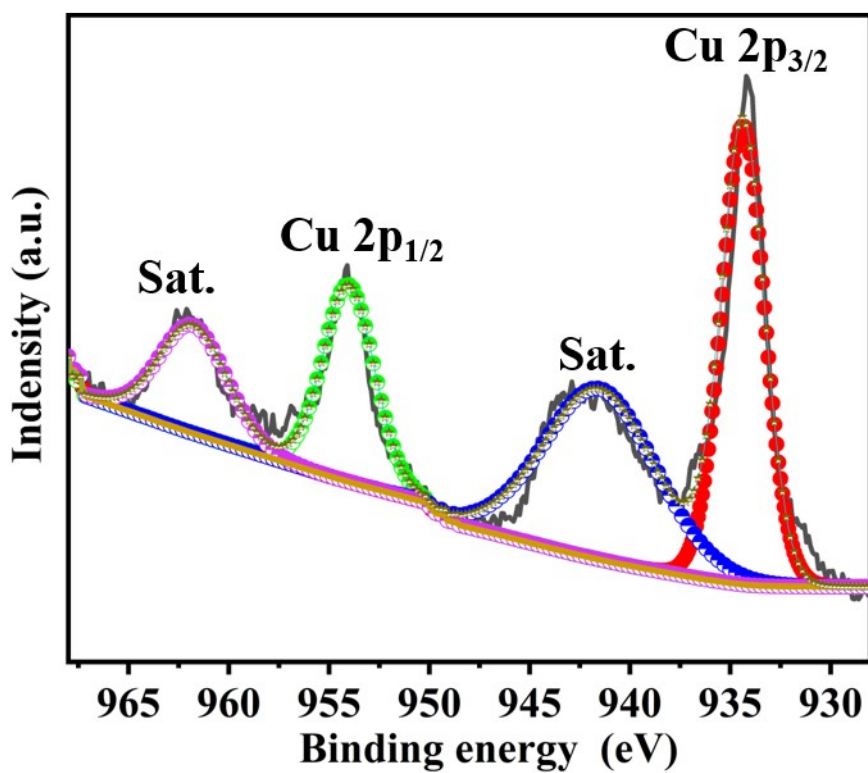

Fig. S6. The high-resolution Cu 2p XPS spectra of pristine Cu-MOFs.

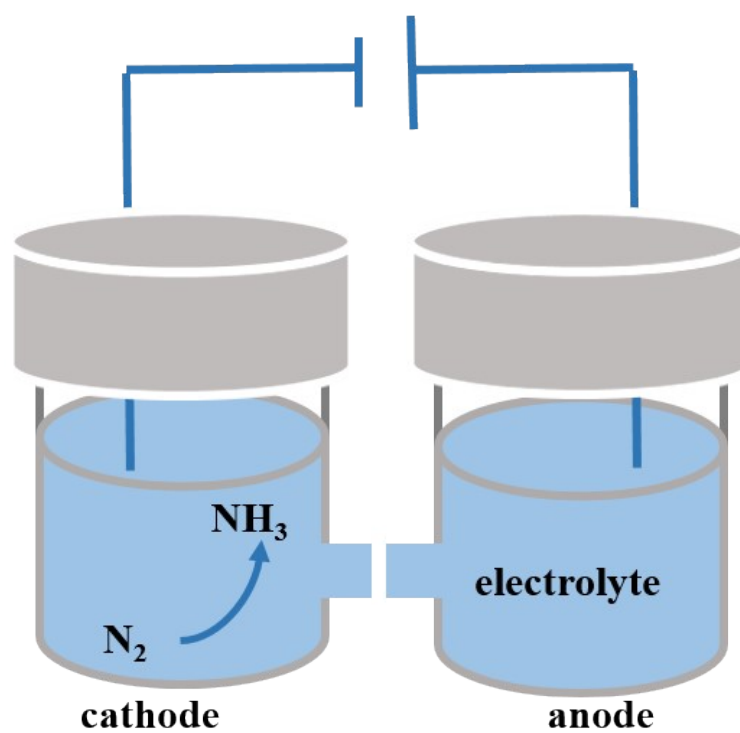

Fig. S7. The simple schematic diagram of H-type cell.

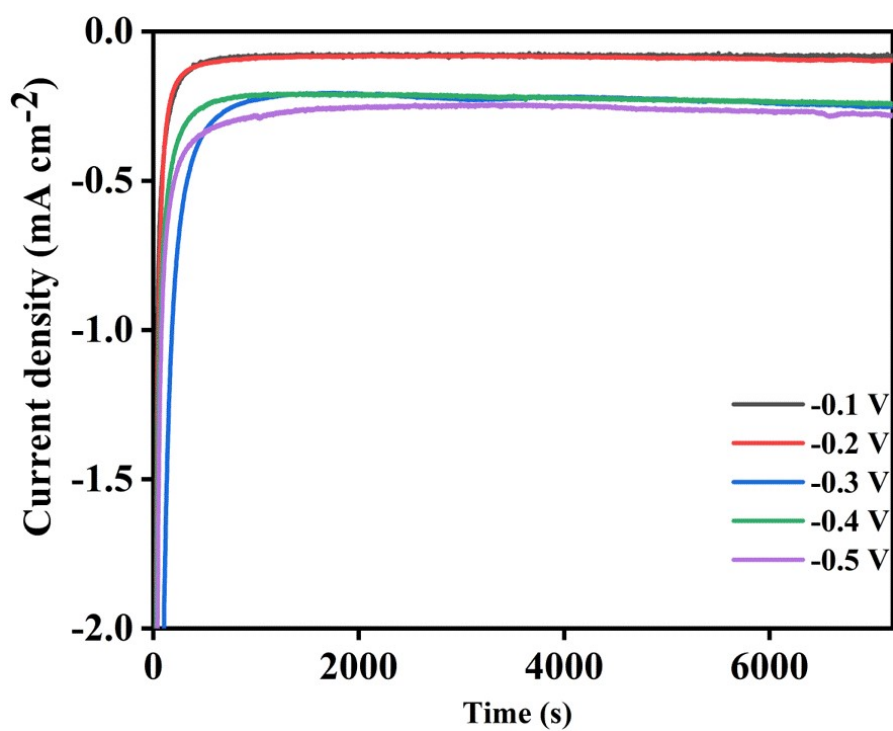

Fig. S8. Chronoamperometry results of  $\text{Cu}_3\text{P@NC}$  at the corresponding potentials.

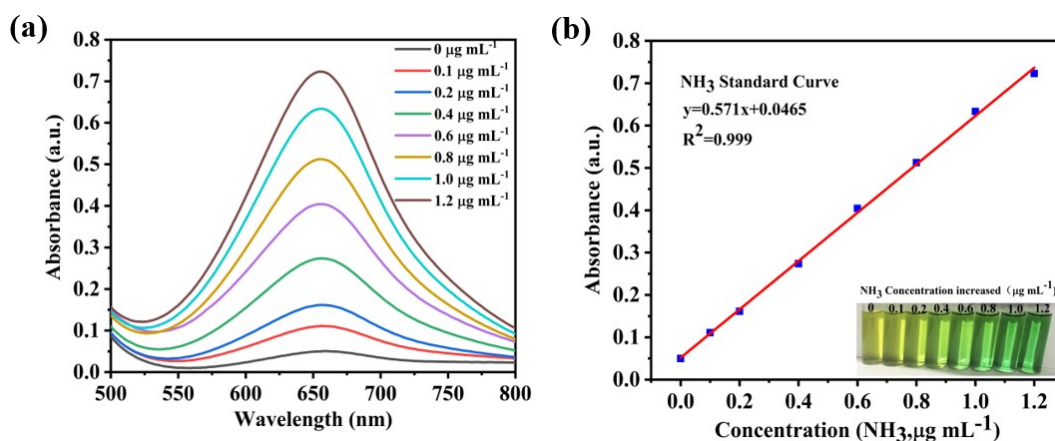

**Fig. S9.** UV-vis absorption spectra of indophenol assays with  $\text{NH}_4^+$  in 0.1 M  $\text{Na}_2\text{SO}_4$  after incubated for 2 h at room temperature. (b) Calibration curve used for calculation of  $\text{NH}_3$  concentration.

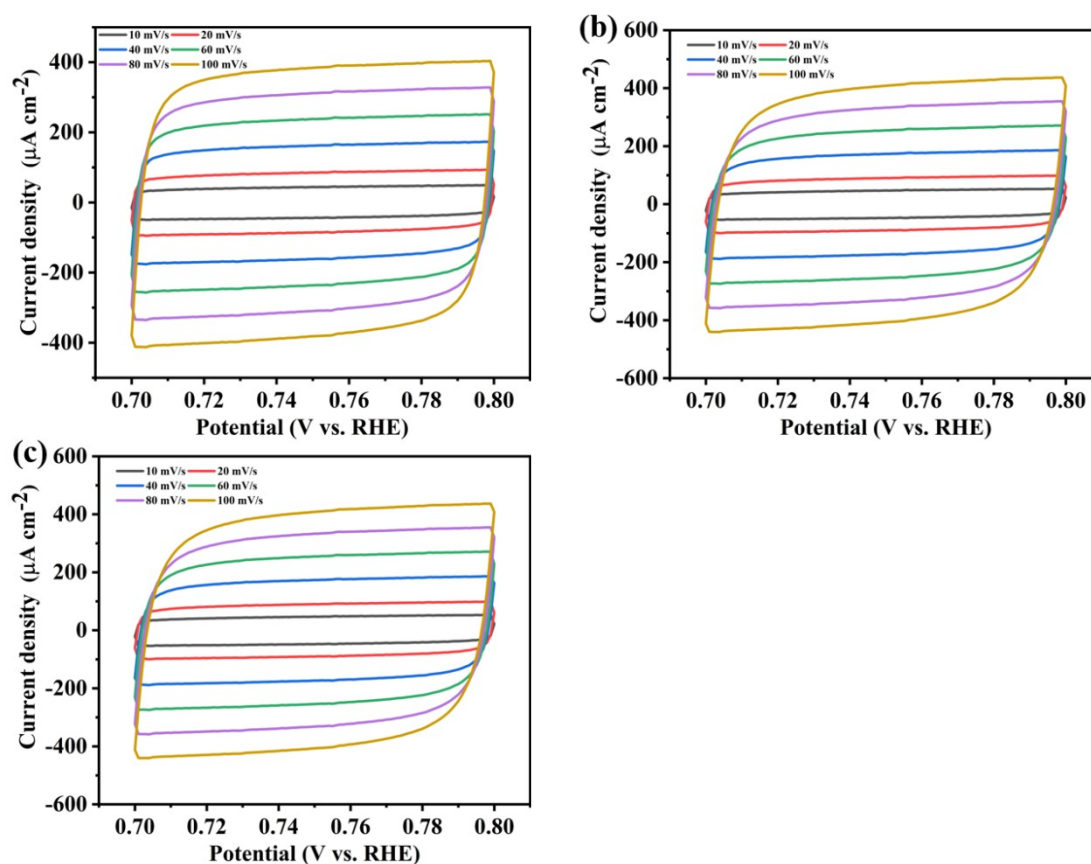

**Fig. S10.** The CV curves of (a)  $\text{Cu}_3\text{P}$ , (b)  $\text{Cu}_3\text{P}@C$  and (c)  $\text{Cu}_3\text{P}@NC$  at different scan rates.

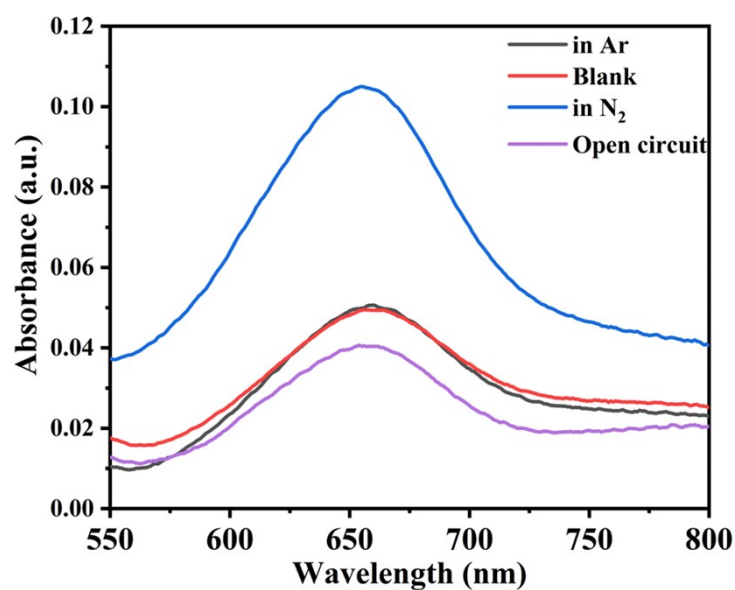

**Fig. S11.** UV-vis absorption spectrums of all controlled experiments including Ar gas, blank carbon and open circuit.

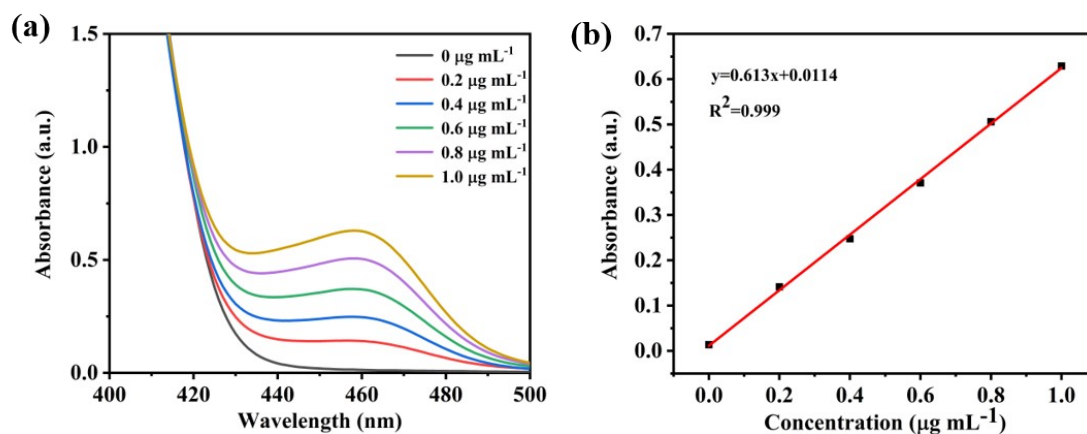

**Fig. S12.** UV-vis absorption spectra of various  $N_2H_4$  concentration stained with p- $C_9H_{11}NO$  indicator after incubated for 20 min at room temperature. (b) Calibration curve used for calculation of  $N_2H_4$  concentration.

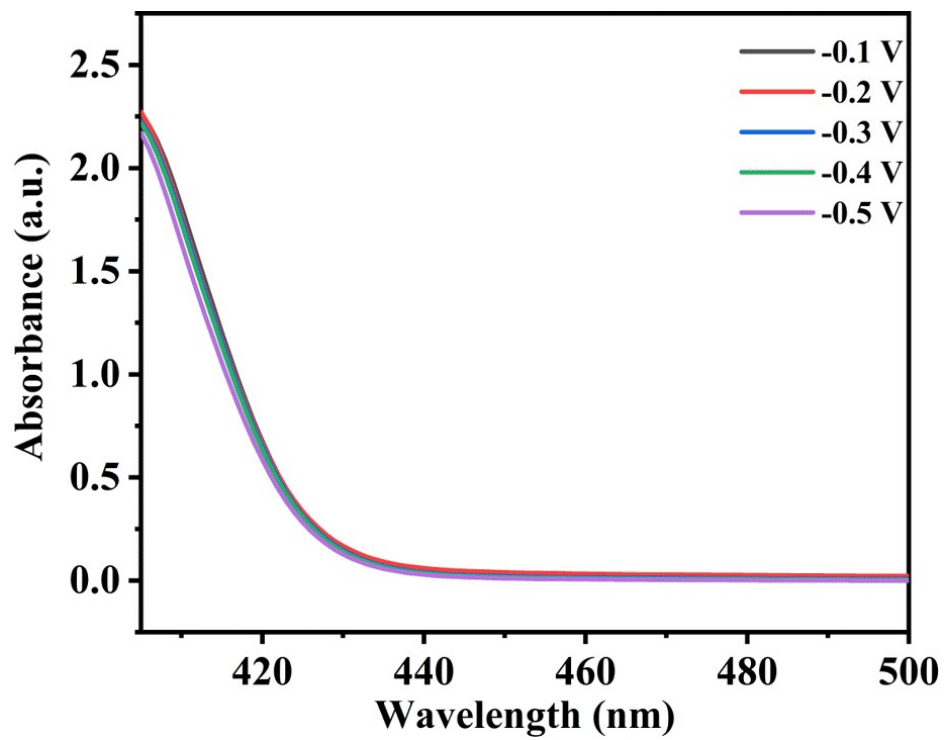

**Fig. S13.** UV-vis absorption spectra Cu<sub>3</sub>P@NC of at corresponding potentials to detect by-product.

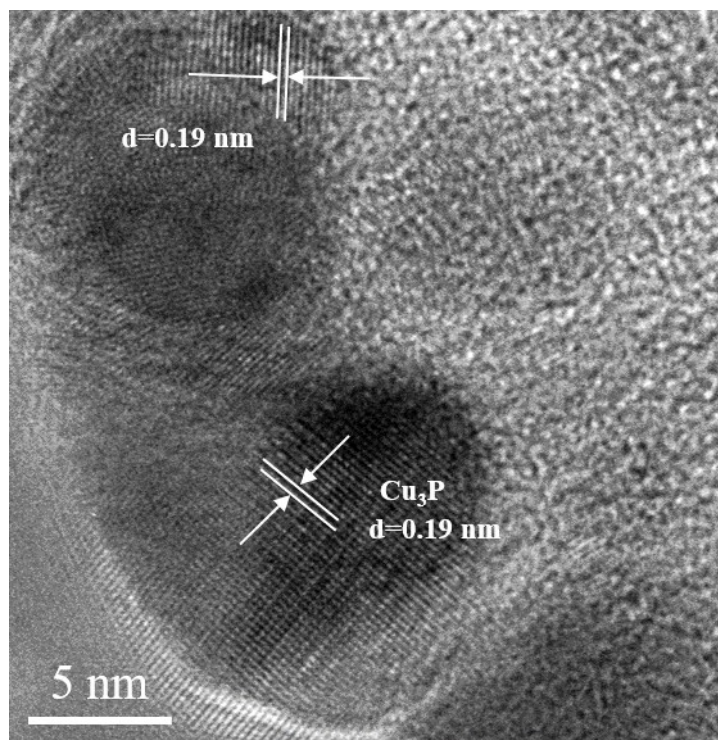

**Fig. S14.** High-resolution TEM image of the Cu<sub>3</sub>P@NC after NRR test.

**Table S1.** Comparison of the NRR activity of the Cu<sub>3</sub>P@NC with other electrocatalysts previously reported.

| Catalysts                        | Electrolytes                              | NH <sub>3</sub> yield rate                                   | FE (%)      | Reference        |
|----------------------------------|-------------------------------------------|--------------------------------------------------------------|-------------|------------------|
| ZrO <sub>2</sub>                 | 0.1 M Na <sub>2</sub> SO <sub>4</sub>     | 9.6 μg h <sup>-1</sup> mg <sup>-1</sup>                      | 12.1        | 3                |
| Fe-MoS <sub>2</sub>              | 0.5 M K <sub>2</sub> SO <sub>4</sub>      | 8.6 μg h <sup>-1</sup> mg <sup>-1</sup>                      | 18.8        | 4                |
| Pd/C                             | 0.1 M PBS                                 | 4.5 μg h <sup>-1</sup> mg <sup>-1</sup>                      | 8.2         | 5                |
| Pd-Co/CuO                        | 0.1 M KOH                                 | 10.04 μg h <sup>-1</sup> mg <sup>-1</sup>                    | 2.16        | 6                |
| PdCu Amorphous Nanocluster       | 0.1 M KOH                                 | 2.8 μg h <sup>-1</sup> mg <sup>-1</sup>                      | 0.38        | 7                |
| Au nanorods                      | 0.1 M KOH                                 | 6.042 μg h <sup>-1</sup> mg <sup>-1</sup>                    | 4           | 8                |
| SnO <sub>2</sub>                 | 0.1 M Na <sub>2</sub> SO <sub>4</sub>     | 4.03 μg h <sup>-1</sup> mg <sup>-1</sup>                     | 2.17        | 9                |
| PdZn/NHCP                        | 0.1 M PMS                                 | 5.3 μg h <sup>-1</sup> mg <sup>-1</sup>                      | 16.9        | 10               |
| γ-Fe <sub>2</sub> O <sub>3</sub> | 0.1 M KOH                                 | 0.212 μg h <sup>-1</sup> mg <sup>-1</sup>                    | 1.9         | 11               |
| aAu/CeOxRGO                      | 0.1 M HCl                                 | 8.3 μg h <sup>-1</sup> mg <sup>-1</sup>                      | 10.1        | 12               |
| BCN                              | 0.1 M HCl                                 | 7.75 μg h <sup>-1</sup> mg <sup>-1</sup>                     | 13.79       | 13               |
| <b>Cu<sub>3</sub>P@NC</b>        | <b>0.1 M Na<sub>2</sub>SO<sub>4</sub></b> | <b>10.4 μg h<sup>-1</sup> mg<sub>cat.</sub><sup>-1</sup></b> | <b>6.34</b> | <b>This work</b> |

## Reference:

1. Ying Wang, Xiaoqiang Cui, Jingxiang Zhao, Guangri Jia, Lin Gu, Qinghua Zhang, Lingkun Meng, Zhan Shi, Lirong Zheng, Chunyu Wang, Ziwei Zhang,<sup>†</sup> and Weitao Zheng, *ACS Catal.* 2019, 9, 336-344.
2. Jiaxin Yao, Yitong Zhou, Jun-Min Yan, and Qing Jiang, *Adv. Energy Mater.* 2021, 2003701.
3. Jiaojiao Xia, Haoran Guo, Maozeng Cheng, Chuyan Chen, Minkang Wang, Yong Xiang, a Tingshuai Li and Enrico Traversa, *J. Mater. Chem. A*, 2021,9, 2145-2151.
4. Hongyang Su, Lanlan Chen, Yizhen Chen, Rui Si, Yuting Wu, Xiaonan Wu, Zhigang Geng, Wenhua Zhang, and Jie Zeng, *Angew. Chem.* 2020, 132, 20591 –20596.
5. Jun Wang, Liang Yu, Lin Hu, Gang Chen, Hongliang Xin, Xiaofeng Feng, *Nature communications* | (2018) 9:1795.
6. Wenzhi Fu, Yudong Cao, Qianyi Feng, William R. Smith, Pei Dong, Mingxin Ye and Jianfeng Shen, *Nanoscale*, 2019, 11, 1379–1385.
7. Shi, M. M.; Bao, D.; Li, S. J.; Wulan, B. R.; Yan, J. M.; Jiang, Q. J. A. E. M., *Adv. Energy Mater.* 2018, 8 (21), 1800124.
8. Bao, D.; Zhang, Q.; Meng, F. L.; Zhong, H. X.; Shi, M. M.; Zhang, Y.; Yan, J. M.; Jiang, Q.; Zhang, X. B. J. A. m, *Adv. Mater.* 2017, 29 (3), 1604799.
9. Zhang, L.; Ren, X.; Luo, Y.; Shi, X.; Asiri, A. M.; Li, T.; Sun, X., *Chem. Commun.* 2018, 54, 12966–12969.
10. Min Ma, Xiao Han, Huiqi Li, Xibo Zhang, Zhiping Zheng, Lingyun Zhou, Jun Zheng, Zhaoxiong Xie, Qin Kuan, Lansun Zheng, *Applied Catalysis B: Environmental*

265 (2020) 118568.

11. Kong, J.; Lim, A.; Yoon, C.; Jang, J. H.; Ham, H. C.; Han, J.; Nam, S.; Kim, D.; Sung, Y.-E.; Choi, J. J. A. S. C, ACS Sustain. Chem. Eng. 2017, 5 (11), 10986-10995.

12. Li, S. J.; Bao, D.; Shi, M. M.; Wulan, B. R.; Yan, J. M.; Jiang, Q, Adv. Mater. 2017, 29, 1700001.

13. Chen, C.; Yan, D.; Wang, Y.; Zhou, Y.; Zou, Y.; Li, Y.; Wang, S, Small 2019, 15,1805029.
